# Supplementary material for: Direct Comparisons of Efficacy and Safety Between Actinomycin-D and Methotrexate in Women With Low-Risk Gestational Trophoblastic Neoplasia: A Systematic Review and Meta-Analysis
Source: Research Square preprint supplement (doi:10.21203/rs.3.rs-151497/v1), 2021-02-08
Supplement: Supplementary file 1 [file 6c14c50bf7e0490e86853f91.xlsx]

## Sheet: 工作表1
	Table 3. Modified MINORS scores of all eligible non-randomised comparative studies in this meta-analysis.
	Study	Consecutive patients	Prospective data collection	Reported end-points	Unbiased outcome evaluation	Appropriate controls	Contemporary groups	Groups equivalent	Sample size	Score
	Verhoef (2017)	2	0	2	1	2	2	1	1	11
	Al-Husaini (2014)	2	0	2	1	2	2	1	1	11
	Uberti (2015)	2	0	2	1	2	2	2	1	12
	Abrao (2008)	2	0	2	2	2	2	2	2	14
	Yarandi (2008)	2	0	2	2	2	2	2	2	14
	Baptista (2012)	2	2	2	2	2	2	2	2	16
	Lee (2017)	2	0	2	1	2	2	1	1	11
	Matsui (2005)	2	0	2	1	2	2	1	1	11
	Matsui (1998)	2	0	2	1	2	2	1	1	11
