# Supplementary material for: Direct Comparisons of Efficacy and Safety Between Actinomycin-D and Methotrexate in Women With Low-Risk Gestational Trophoblastic Neoplasia: A Systematic Review and Meta-Analysis
Source: Research Square preprint supplement (doi:10.21203/rs.3.rs-151497/v1), 2021-02-08
Supplement: Supplementary file 2 [file b30e9924ec93af9fe3648c10.xlsx]

## Sheet: Sheet1
	Table 4. Pooled incidences of selected toxicities
			Act-D-based regimen (n=687)			MTX-based regimen (n=987)
	Adverse events	Studies(t)	Patients(n1/n2)	%		Patients(n1/n2)	%
	Hematologic disorders											37	127	0.291339
	Anemia	2	46/129	35.6589		37/127	29.1339		46	129	0.356589	24	182	0.131868
	Leucocytopenia	3	27/208	12.9808		24/182	13.1868		27	208	0.129808	26	264	0.0984848
	Neutropenia	5	31/259	11.9691		26/264	9.84848		31	259	0.119691	9	221	0.040724
	Thrombocytopnia	5	18/248	7.25806		9/221	4.0724		18	248	0.0725806
	Gastrointestinal disorders								32	134	0.238806	19	110	0.172727
	Constipation	3	32/134	23.8806		19/110	17.2727		29	308	0.0941558	35	348	0.100575
	Diarrhea	5	29/308	9.41558		35/348	10.0575		167	405	0.412346	85	427	0.199063
	Nausea	9	167/405	41.2346		85/427	19.9063		92	436	0.211009	43	449	0.0957684
	Vomiting	9	92/436	21.1009		43/449	9.57684		69	232	0.297414
	Others								13	130	0.1	19	207	0.0917874
	Alopecia	7	69/232	29.7414		19/207	9.17874		84	134	0.626866	9	138	0.0652174
	Anorexia	3	13/130	10		9/138	6.52174		11	223	0.0493274	60	110	0.545455
	Fatigue	3	84/134	62.6866		60/110	54.5455					28	223	0.125561
	Liver toxicity	5	11/223	4.93274		28/223	12.5561
	Act-D=Actinomycin D, MTX=Methotrexate, t=the number of studies reporting the toxicity, n=total number of enrolled patients, n1=the number of patients with adverse events, n2=the total number of patients from studies reporting the toxicity.
