# Supplementary material for: Direct Comparisons of Efficacy and Safety Between Actinomycin-D and Methotrexate in Women With Low-Risk Gestational Trophoblastic Neoplasia: A Systematic Review and Meta-Analysis
Source: Research Square preprint supplement (doi:10.21203/rs.3.rs-151497/v1), 2021-02-08
Supplement: Supplementary file 4 [file f0bb7b34d1059722cfbdeea5.xlsx]

## Sheet: 工作表1
	Table 2. Quality assessment of the 8 randoized controlled trials for the meta-analysis.
	Study	Adequate random sequence generation	Allocation concealment	Blinding method	Adequate assessment of each outcome	Free of selective reporting	Modified Jadad score
	Kang (2019)	Y	U	U	Y	Y	5
	Yarandi (2016)	Y	Y	Y	Y	Y	7
	Shahbazian (2014)	U	U	U	Y	Y	4
	Mousavi (2012)	Y	U	U	Y	Y	5
	Lertkhachonsuk (2009)	Y	U	U	Y	Y	5
	Osborne (2011)	Y	N	Y	Y	Y	5
	Gilani (2005)	Y	U	U	Y	Y	5
	Schink (2020)	Y	U	U	Y	Y	5
	U=unclear, Y=yes, N=no.
